# Supplementary material
Source: Springer Nature journal article supplement (https://www.springermedizin.de/resource/supplementary/12936_2011_1853_MOESM1_ESM.pdf/9541860)

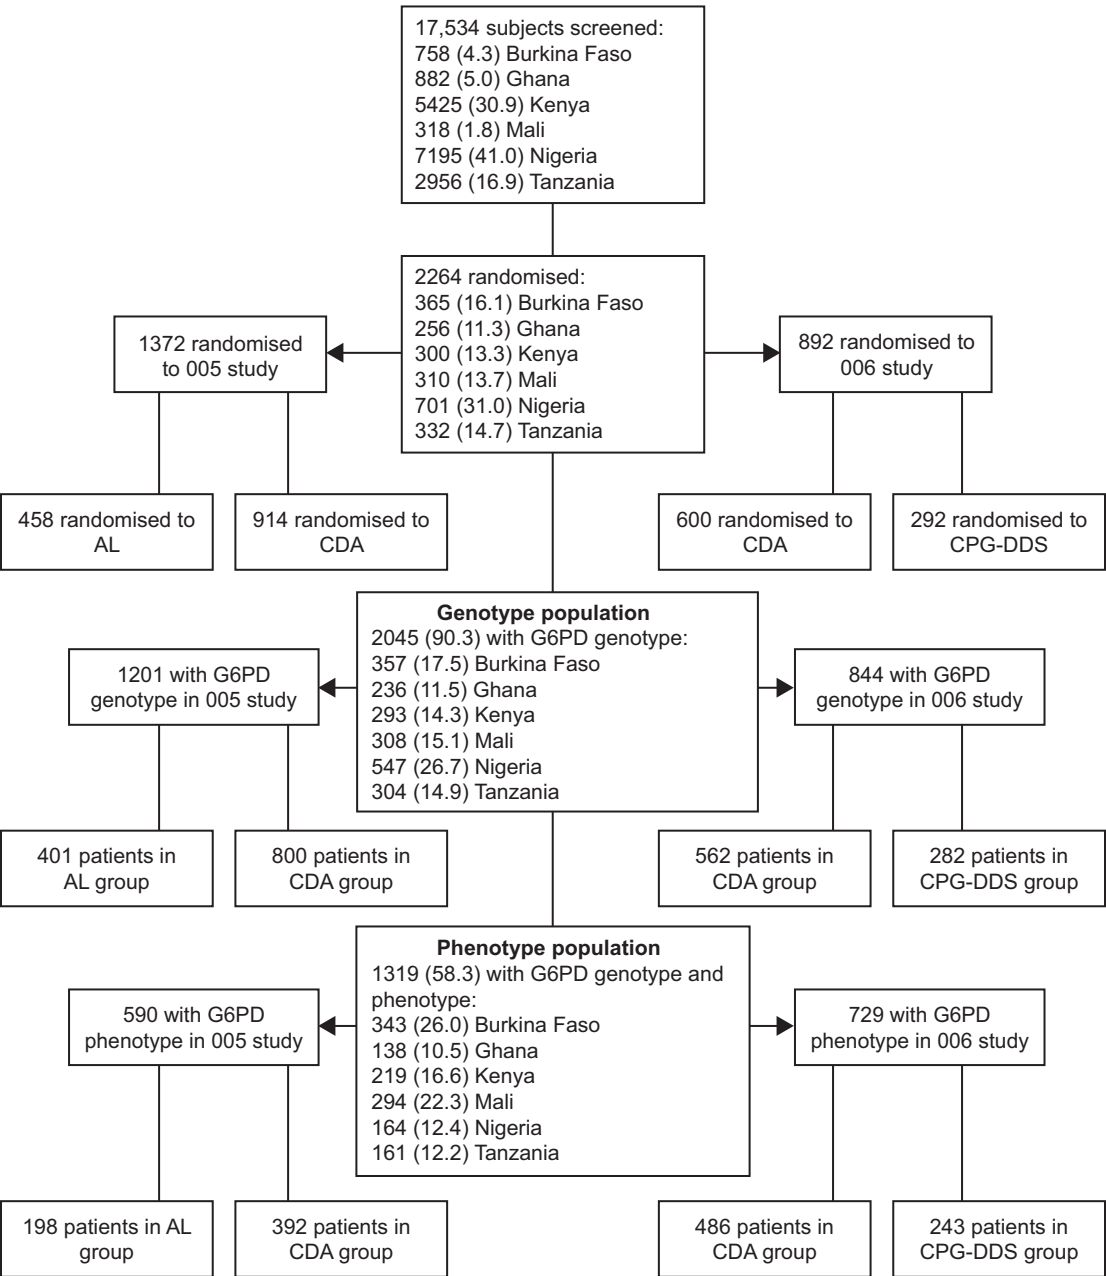

All values are shown as n (%).

Supplement: MOESM1 [file 9541860]
